# Supplementary material for: Surgery-induced wound response promotes stem-like and tumor-initiating features of breast cancer cells, via STAT3 signaling
Source: PubMed Central journal article supplement (PMC4171628; doi:10.18632/oncotarget.2195), 2014-07-09
Supplement: oncotarget-05-6267-s001.pdf [file oncotarget-05-6267-s001.pdf]

# Surgery-induced wound response promotes stem-like and tumor-initiating features of breast cancer cells, *via* STAT3 signaling

## Supplementary Material

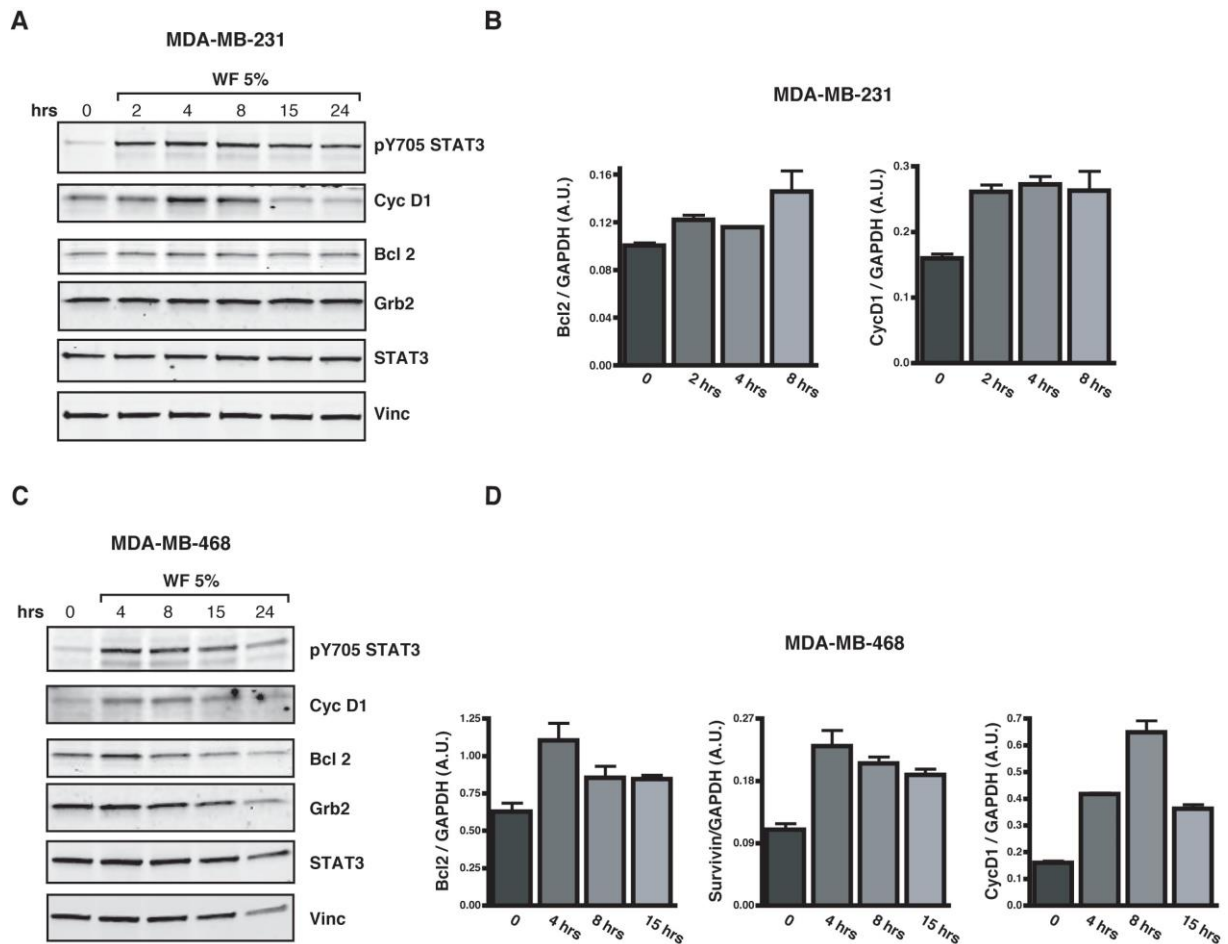

**Supplemental Figure S1.** Breast cancer cell stimulation with WF elicits sustained activation of STAT3 signaling pathway. **(A)** Western blot analysis of MDA-MB-231 cells serum starved and then stimulated for the indicated times with 5% wound fluids (WF). Grb2 and vinculin expression were used as loading control. **(B)** qRT-PCR analysis of Bcl-2 and Cyclin D1 expression in MDA-MB-231 cells serum starved and then stimulated for the indicated times with 5% WF. Data represents the mean ( $\pm$  S.D.) of two independent experiments performed in triplicate. **(C)** Same as in (A) but using MDA-MB-468 cells. **(D)** Same as in (B) but using MDA-MB-468 cells and analyzing the expression of Bcl-2, Survivin and Cyclin D1.

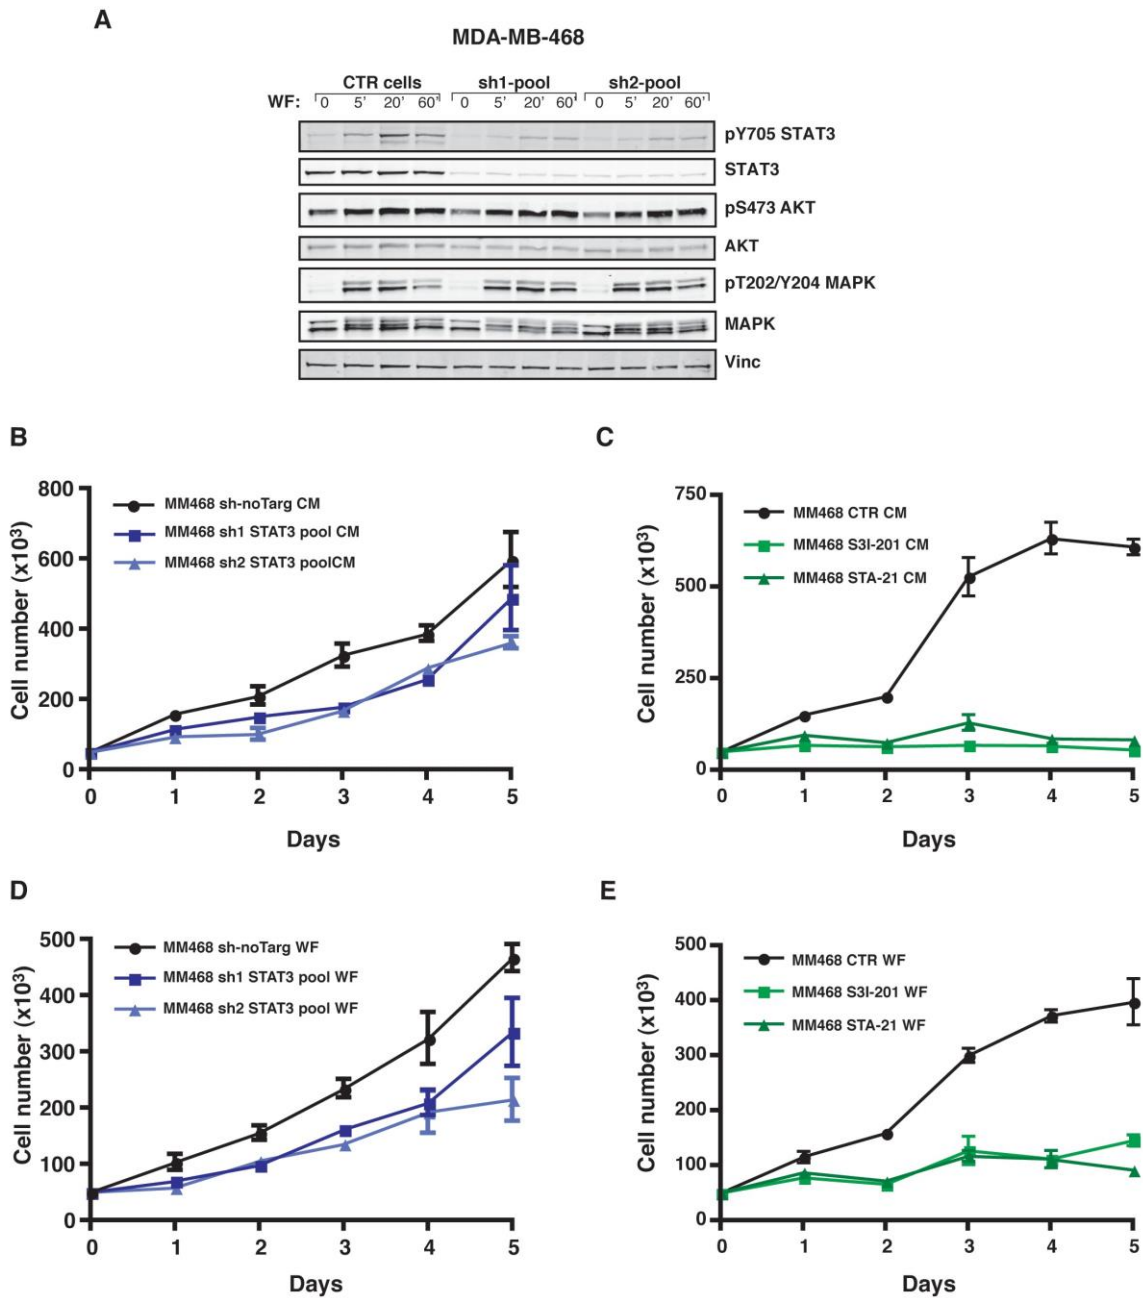

**Supplemental Figure S2.** Activation of STAT3 following WF stimulation is efficiently impaired in breast cancer cells modified for STAT3 expression. (A) Western blot analysis of MDA-MB-468 cell line stably transduced with a lentiviral vector encoding for control sh-RNA (CTR) or for sh-RNAs directed against human STAT3 (sh), serum starved and then stimulated

for the indicated times with 5% wound fluids (WF). Vinculin expression was used as loading control. **(B)** Growth curve analysis of MDA-MB-468 control cells (sh-no Target) or STAT3 silenced clones (sh-STAT3). Cells ( $50 \times 10^3$ /well) have been seeded on day 0, in complete medium (CM) as indicated, and then counted by Trypan blue exclusion test, every day for 5 days. Two independent cell clones have been evaluated. Data represents the mean ( $\pm$  S.D.) of two independent experiments performed in triplicate. **(C)** Same as in (B), but seeding cells in serum free medium supplemented with 3% wound fluids (WF). Two independent cell clones have been evaluated. Data represents the mean ( $\pm$  S.D.) of two independent experiments performed in triplicate. **(D)** Growth curve analysis of MDA-MB-468 cell line in the presence of the indicated inhibitors. Cells ( $50 \times 10^3$ /well) have been seeded in complete medium (CM) on day 0, in the presence of S3I-201 (100  $\mu$ M) or STA-21 (30  $\mu$ M) or vehicle (CTR) and then counted by Trypan Blue exclusion test, every day for 5 days. Fresh medium containing the inhibitor was replaced on day 3. Data represent the mean ( $\pm$  S.D.) of two independent experiments performed in triplicate. **(E)** Same as in (D), but seeding cells in serum free medium supplemented with 3% wound fluids (WF). Data represents the mean ( $\pm$  S.D.) of two independent experiments performed in triplicate.

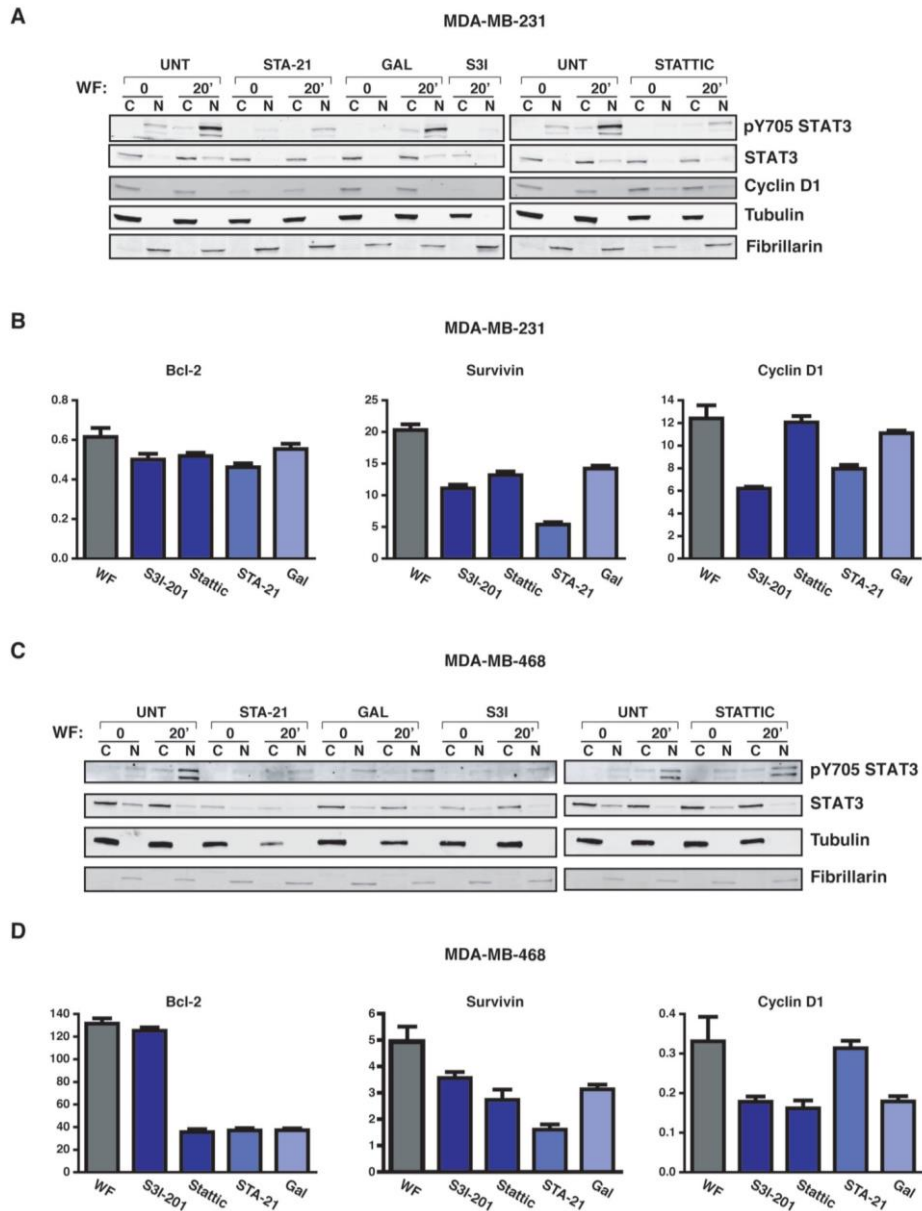

5

**Supplemental Figure S3.** Activation of STAT3 following WF stimulation is efficiently impaired in STAT3 inhibited breast cancer cell lines. **(A)** Western blot analysis of cytoplasmic and nuclear fraction of MDA-MB-231 cells, serum starved and harvested at time 0 or stimulated for 20 minutes with 5% wound fluids (WF), with or without STAT3 inhibitors (STA-21, 30  $\mu$ M; Galiellalactone, 12  $\mu$ M; S3I-201, 50  $\mu$ M; and Stattic, 10  $\mu$ M). Tubulin was used as cytoplasmic marker, fibrillarlin as nuclear marker. **(B)** qRT-PCR analysis of Bcl-2,

Survivin and Cyclin D1 expression in MDA-MB-231, stimulated with WF and treated with STAT3 inhibitors (S3I-201, 50  $\mu$ M; Stattic, 10  $\mu$ M; STA-21, 30  $\mu$ M; and Galiellalactone, 12  $\mu$ M) or left untreated (WF). (C) Western blot analysis of cytoplasmic and nuclear fraction in MDA-MB-468 cells, serum starved and harvested at time 0 or stimulated for 20 minutes with 5% wound fluids (WF), with or without STAT3 inhibitors (STA-21, 30  $\mu$ M; Galiellalactone, 25  $\mu$ M; S3I-201, 100  $\mu$ M; and Stattic, 10  $\mu$ M). Tubulin was used as cytoplasmic marker, fibrillarin as nuclear marker. (D) Same as in (B), but in MDA-MB-468 cells.

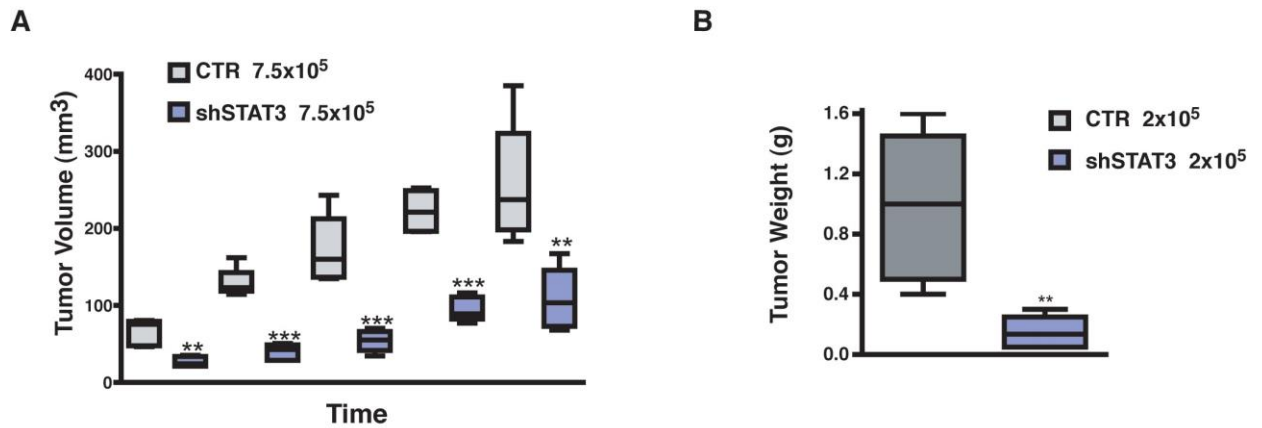

**Supplemental Figure S4.** Growth of primary breast tumors is significantly suppressed by silencing STAT3 expression. **(A)** Graph reports the volume (mm<sup>3</sup>) of primary tumors derived from injection of 7.5x10<sup>5</sup> MDA-MB 231 control (CTR) or STAT3 silenced (sh-STAT3) cells in thoracic mammary fat pads of nude mice (2 MFP/mouse) in 50  $\mu$ l Matrigel/PBS (1:1). **(B)** Graph reports the tumor weight of the experiment described in Figure 5D. One asterisk (\*) indicates a p value  $\leq$  0.05, two asterisks (\*\*) a p value  $\leq$  0.01 and three asterisk (\*\*\*) a p value  $\leq$  0.005.
